# Supplementary material
Source: publisher site journal article supplement (https://www.spandidos-publications.com/5397/downloadSupplementary)
Supplement: Supplementary file 1 [file downloadSupplementary]

Table SI. Charlson Comorbidity Index.

| Point | Comorbidity                                                                                                                                                                                                                                    |
|-------|------------------------------------------------------------------------------------------------------------------------------------------------------------------------------------------------------------------------------------------------|
| 1     | Myocardial infarction, heart failure, peripheral vascular disease, cerebrovascular disease, dementia, chronic pulmonary disease, connective tissue disorder, peptic ulcer disease, mild liver disease, diabetes mellitus without complications |
| 2     | Diabetes mellitus with complications, moderate-to-severe renal disease, hemiplegia, leukemia, lymphoma, tumor without metastases                                                                                                               |
| 3     | Moderate-to-severe liver disease                                                                                                                                                                                                               |
| 6     | Metastatic solid tumors, acquired immunodeficiency syndrome                                                                                                                                                                                    |

Table SII. Comparison of in-hospital mortality for different intensive care unit stay time.

|                                | All patients<br>(n=2547) | Stay time <24 h<br>(n=212) | Stay time ≥24 h<br>(n=2305) | P-value |
|--------------------------------|--------------------------|----------------------------|-----------------------------|---------|
| In-hospital mortality<br>n (%) | 916 (35.9)               | 95 (44.9)                  | 821 (35.6)                  | 0.0071  |

Table SIII. Comparison of in-hospital mortality for different numbers of admissions.

| In-hospital mortality | All patients<br>(n=2547) | Multiple-admissions<br>(n=791) | First admission<br>(n=1756) | P-value |
|-----------------------|--------------------------|--------------------------------|-----------------------------|---------|
| n (%)                 | 916 (35.9)               | 326 (41.2)                     | 590 (33.6)                  | 0.0002  |

Table SIV. Univariate analysis for in-hospital mortality.

| Covariate                              | Hazard ratio (95% CI) | P-value |
|----------------------------------------|-----------------------|---------|
| Sex                                    |                       | 0.426   |
| Male                                   | 1.00                  |         |
| Female                                 | 1.08 (0.90,1.29)      |         |
| Age (years)                            |                       | <0.001  |
| <65                                    | 1.00                  |         |
| ≥65                                    | 2.02 (1.64,2.50)      |         |
| Etiology                               |                       |         |
| Acute myocardial infarction            | 0.96 (0.80,1.16)      | 0.689   |
| Acute heart failure                    | 0.49 (0.41,0.58)      | <0.001  |
| History of disease                     |                       |         |
| Hypertension                           | 1.12 (0.91,1.39)      | 0.276   |
| Chronic kidney disease                 | 1.39 (1.09,1.78)      | 0.007   |
| Ischemic stroke                        | 1.10 (0.77,1.58)      | 0.599   |
| Peripheral vascular disease            | 1.10 (0.89,1.36)      | 0.364   |
| Dementia                               | 1.16 (0.72,1.86)      | 0.535   |
| Chronic pulmonary disease              | 1.11 (0.92,1.34)      | 0.268   |
| Peptic ulcer                           | 0.56 (0.31,1.02)      | 0.057   |
| Diabetes                               | 1.08 (0.84,1.38)      | 0.562   |
| Paraplegia                             | 0.10 (0.60,1.67)      | 0.988   |
| Malignant cancer                       | 1.44 (1.08,1.91)      | 0.013   |
| Severe liver disease                   | 1.23 (0.80,1.88)      | 0.348   |
| Scoring system                         |                       |         |
| Charlson comorbidity index             | 1.10 (1.06,1.13)      | <0.001  |
| ACCI ≥8                                | 1.56 (1.31,1.86)      | <0.001  |
| Oxford Acute Severity of Illness Score | 1.05 (1.04,1.06)      | <0.001  |
| In-hospital management                 |                       |         |
| Mechanical ventilation                 | 1.38 (1.15,1.65)      | <0.001  |
| Extracorporeal membrane oxygenation    | 1.32 (0.89,1.96)      | 0.172   |
| Vital signs at presentation            |                       |         |
| Heart rate                             | 1.00 (1.00,1.01)      | 0.401   |
| Mean blood pressure                    | 0.98 (0.97,0.99)      | <0.001  |
| Laboratory findings                    |                       |         |
| Hemoglobin                             | 0.93 (0.90,0.97)      | <0.001  |
| Platelets                              | 1.00 (1.00,1.00)      | 0.466   |
| White blood cell                       | 1.01 (1.00,1.02)      | 0.030   |
| Serum creatinine                       | 1.08 (1.04,1.12)      | <0.001  |
| Vasopressors                           |                       |         |
| Dobutamine                             | 1.21 (1.00,1.47)      | 0.050   |
| Norepinephrine                         | 2.49 (1.98,3.15)      | <0.001  |
| Dopamine                               | 1.44 (1.18,1.75)      | <0.001  |

ACCI, age-adjusted Charlson comorbidity index; CI, confidence interval.

Table SV. Threshold effect analysis of ACCI on in-hospital mortality excluded patients whose diagnoses sequence number  $\geq 5$  as a sensitivity analysis.

| Threshold of ACCI         | Hazard ratio | 95% confidence interval | P-value |
|---------------------------|--------------|-------------------------|---------|
| <3.9                      | 0.469        | 0.174,1.261             | 0.134   |
| $\geq 3.9$                | 1.138        | 1.055,1.228             | <0.001  |
| Log-likelihood ratio test |              |                         | 0.013   |

ACCI, age-adjusted Charlson comorbidity index.

Table SVI. Threshold effect analysis of ACCI on in-hospital mortality excluded patients who received postprocedural cardiogenic shock.

| Threshold of ACCI         | Hazard ratio | 95% confidence interval | P-value |
|---------------------------|--------------|-------------------------|---------|
| <4.5                      | 0.816        | 0.495,1.347             | 0.427   |
| ≥4.5                      | 1.125        | 1.053,1.201             | <0.001  |
| Log-likelihood ratio test |              |                         | <0.001  |

ACCI, age-adjusted Charlson comorbidity index.

Table SVII. Association between ACCI scores and in-hospital mortality in multiple regression model excluded patients who received postprocedural cardiogenic shock.

| Variable | Model I          |         | Model II         |         | Model III        |         | Model IV         |         |
|----------|------------------|---------|------------------|---------|------------------|---------|------------------|---------|
|          | HR (95% CI)      | P-value |
| ACCI     | 1.10 (1.06-1.14) | <0.001  | 1.05 (1.01-1.10) | 0.015   | 1.12 (1.06-1.19) | <0.001  | 1.09 (1.03-1.16) | 0.005   |
| ACCI <8  | 1.00 (Ref)       |         | 1.00 (Ref)       |         | 1.00 (Ref)       |         | 1.00 (Ref)       |         |
| ACCI ≥8  | 1.58 (1.31-1.91) | <0.001  | 1.31 (1.07-1.60) | 0.009   | 1.70 (1.31-2.20) | <0.001  | 1.47 (1.13-1.91) | 0.004   |

Model I didn't adjust for confounders. Model II adjusted for age + sex. Model III: Model II + hypertension, CKD, stroke, COPD, dementia, Paraplegia 1, peptic ulcer disease 1, diabetes, severe liver disease 1, malignant cancer 1, peripheral vascular disease, AMI and AHF. Model IV: Model III + heart rate, MBP, hemoglobin, platelets, WBC, creatinine, OASIS, MV, ECMO, dobutamine, norepinephrine and dopamine. ACCI, age-adjusted Charlson comorbidity index; HR, hazard ratio; CI, confidence interval.

Table SVIII. Association between ACCI scores and in-hospital mortality in multiple regression model excluded patients whose diagnoses sequence number  $\geq 5$  as a sensitivity analysis.

| Variable      | Model I          |         | Model II         |         | Model III        |         | Model IV         |         |
|---------------|------------------|---------|------------------|---------|------------------|---------|------------------|---------|
|               | HR (95% CI)      | P-value |
| ACCI          | 1.09 (1.05-1.13) | <0.001  | 1.04 (0.99-1.09) | 0.114   | 1.14 (1.06-1.22) | <0.001  | 1.11 (1.03-1.20) | 0.004   |
| ACCI <8       | 1.00 (Ref)       |         | 1.00 (Ref)       |         | 1.00 (Ref)       |         | 1.00 (Ref)       |         |
| ACCI $\geq 8$ | 1.48 (1.20-1.84) | <0.001  | 1.20 (0.96-1.51) | 0.116   | 1.64 (1.22-2.19) | 0.001   | 1.51 (1.12-2.03) | 0.007   |

Model didn't adjust for confounders. Model II: Adjusted for age + sex. Model III: Model II + hypertension, CKD, stroke, COPD, dementia, paraplegia 1, peptic ulcer disease 1, diabetes, severe liver disease 1, malignant cancer 1, peripheral vascular disease, AMI, AHF. Model IV: Model III + heart rate, MBP, hemoglobin, platelets, WBC, creatinine, OASIS, MV, ECMO, dobutamine, norepinephrine, dopamine. ACCI, age-adjusted Charlson comorbidity index; HR, hazard ratio; CI, confidence interval
